# Supplementary material for: Mendelian Randomization Analysis Identifies CpG Sites as Putative Mediators for Genetic Influences on Cardiovascular Disease Risk
Source: PubMed Central journal article supplement (PMC5630190; doi:10.1016/j.ajhg.2017.09.003), 2017-10-05
Supplement: mmc1.pdf [file mmc1.pdf]

**The American Journal of Human Genetics, Volume 101**

**Supplemental Data**

**Mendelian Randomization Analysis Identifies  
CpG Sites as Putative Mediators for Genetic  
Influences on Cardiovascular Disease Risk**

**Tom G. Richardson, Jie Zheng, George Davey Smith, Nicholas J. Timpson, Tom R. Gaunt, Caroline L. Relton, and Gibran Hemani**

| <b>SNP</b> | <b>Gene</b>   | <b>Chr</b> | <b>BP</b> | <b>MAF</b> | <b>Other</b> | <b>Effect</b> |
|------------|---------------|------------|-----------|------------|--------------|---------------|
| rs266772   | <i>ADIPOQ</i> | 3          | 186546540 | 0.027      | T            | C             |
| rs687621   | <i>ABO</i>    | 9          | 136137065 | 0.328      | G            | A             |
| rs13375019 | <i>LEPR</i>   | 1          | 66123136  | 0.367      | C            | G             |
| rs7549250  | <i>IL6R</i>   | 1          | 154404336 | 0.416      | C            | T             |
| rs169109   | <i>ADIPOQ</i> | 3          | 186525798 | 0.496      | G            | C             |
| rs541041   | <i>APOB</i>   | 2          | 21294975  | 0.181      | G            | A             |
| rs7528419  | <i>SORT1</i>  | 1          | 109817192 | 0.212      | G            | A             |
| rs625145   | <i>APOA1</i>  | 11         | 116727936 | 0.198      | T            | A             |
| rs174544   | <i>FADS1</i>  | 11         | 61567753  | 0.298      | A            | C             |
| rs6749422  | <i>ADCY3</i>  | 2          | 25150011  | 0.487      | G            | C             |

**Table S1: Summary of methylation quantitative trait loci used as instruments in Mendelian randomization analysis** SNP – Single Nucleotide Polymorphism, Chr – Chromosome, BP – Base position, MAF – minor allele frequency, Effect – effect allele coded additively for each SNP in all analyses, Other – other allele for this SNP

| SNP        | Gene          | CpG        | Trait              | Sample Size | Beta   | SE    | P-value                  |
|------------|---------------|------------|--------------------|-------------|--------|-------|--------------------------|
| rs266772   | <i>ADIPOQ</i> | cg05578595 | Adiponectin        | 4248        | -0.990 | 0.070 | 5.97 x 10 <sup>-44</sup> |
| rs687621   | <i>ABO</i>    | cg21160290 | Interleukin-6      | 4241        | -0.260 | 0.023 | 9.74 x 10 <sup>-30</sup> |
| rs13375019 | <i>LEPR</i>   | cg04111102 | C-reactive protein | 4251        | -0.220 | 0.022 | 1.14 x 10 <sup>-22</sup> |
| rs7549250  | <i>IL6R</i>   | cg02856953 | Interleukin-6      | 4241        | -0.169 | 0.022 | 1.87 x 10 <sup>-14</sup> |
| rs169109   | <i>ADIPOQ</i> | cg05578595 | Adiponectin        | 4248        | -0.138 | 0.023 | 2.98 x 10 <sup>-10</sup> |
| rs541041   | <i>APOB</i>   | cg25035485 | Apo B              | 4251        | -0.211 | 0.028 | 4.98 x 10 <sup>-14</sup> |
| rs7528419  | <i>SORT1</i>  | cg00908766 | Apo B              | 4251        | -0.199 | 0.026 | 5.31 x 10 <sup>-14</sup> |
| rs625145   | <i>APOA1</i>  | cg04087571 | Apo A1             | 4251        | 0.204  | 0.027 | 8.00 x 10 <sup>-14</sup> |
| rs174544   | <i>FADS1</i>  | cg19610905 | Cholesterol        | 4250        | -0.141 | 0.023 | 1.96 x 10 <sup>-09</sup> |
| rs6749422  | <i>ADCY3</i>  | cg01884057 | Body mass index    | 6076        | 0.107  | 0.018 | 3.36 x 10 <sup>-09</sup> |

**Table S2: Results of linear regression analysis between genetic variants and traits adjusting for the top 10 principal components**

**Tables S3**

| SNP          | CpG site   | Trait | Beta    | Standard Error | P-value |
|--------------|------------|-------|---------|----------------|---------|
| rs7531118_T  | cg01884057 | BMI   | -3.350  | 4.758          | 0.482   |
| rs7550711_T  | cg01884057 | BMI   | 2.203   | 2.142          | 0.304   |
| rs543874_G   | cg01884057 | BMI   | 0.668   | 1.394          | 0.632   |
| rs13021737_A | cg01884057 | BMI   | 0.077   | 0.749          | 0.918   |
| rs10182181_G | cg01884057 | BMI   | 0.106   | 0.048          | 0.028   |
| rs13078960_G | cg01884057 | BMI   | -0.664  | 1.020          | 0.516   |
| rs1516725_T  | cg01884057 | BMI   | -1.972  | 2.343          | 0.400   |
| rs13130484_T | cg01884057 | BMI   | 1.152   | 2.586          | 0.656   |
| rs2112347_G  | cg01884057 | BMI   | 0.665   | 1.117          | 0.552   |
| rs943005_T   | cg01884057 | BMI   | -1.696  | 2.152          | 0.431   |
| rs2183825_C  | cg01884057 | BMI   | -10.916 | 235.015        | 0.963   |
| rs11030104_G | cg01884057 | BMI   | 0.353   | 1.745          | 0.840   |
| rs3817334_T  | cg01884057 | BMI   | 0.988   | 1.377          | 0.473   |
| rs7138803_A  | cg01884057 | BMI   | -3.670  | 5.625          | 0.514   |
| rs7144011_T  | cg01884057 | BMI   | -0.089  | 2.330          | 0.969   |
| rs13329567_T | cg01884057 | BMI   | -1.057  | 1.076          | 0.326   |
| rs3888190_A  | cg01884057 | BMI   | 1.067   | 2.579          | 0.679   |
| rs6567160_C  | cg01884057 | BMI   | -0.486  | 0.781          | 0.534   |
| rs11672660_T | cg01884057 | BMI   | 5.258   | 21.226         | 0.804   |

**Table S3a: Mendelian randomization analysis using SNPs with evidence of association with BMI from GWAS as instrumental variables to investigate reverse causation at *ADCY3***

| SNP          | CpG site   | Trait       | Beta   | Standard Error | P-value |
|--------------|------------|-------------|--------|----------------|---------|
| rs1108842_C  | cg05578595 | Adiponectin | -0.195 | 0.534          | 0.715   |
| rs1597466_T  | cg05578595 | Adiponectin | 3.774  | 9.589          | 0.694   |
| rs2062632_C  | cg05578595 | Adiponectin | -1.319 | 1.352          | 0.330   |
| rs6810075_C  | cg05578595 | Adiponectin | -1.234 | 0.876          | 0.159   |
| rs7615090_G  | cg05578595 | Adiponectin | 0.231  | 0.533          | 0.665   |
| rs2980879_A  | cg05578595 | Adiponectin | -5.060 | 19.255         | 0.793   |
| rs7955516_C  | cg05578595 | Adiponectin | 1.255  | 2.705          | 0.643   |
| rs601339_G   | cg05578595 | Adiponectin | 0.943  | 1.059          | 0.373   |
| rs7964945_A  | cg05578595 | Adiponectin | -0.600 | 1.779          | 0.736   |
| rs8042532_G  | cg05578595 | Adiponectin | 4.044  | 9.280          | 0.663   |
| rs2927324_C  | cg05578595 | Adiponectin | 5.878  | 31.560         | 0.852   |
| rs12051272_T | cg05578595 | Adiponectin | -1.967 | 2.146          | 0.360   |
| rs731839_G   | cg05578595 | Adiponectin | -0.609 | 0.770          | 0.429   |

**Table S3b: Mendelian randomization analysis using SNPs with evidence of association with adiponectin from GWAS as instrumental variables to investigate reverse causation at *ADIPOQ***

| SNP           | CpG site   | Trait | Beta    | Standard Error | P-value |
|---------------|------------|-------|---------|----------------|---------|
| rs190934192_A | cg25035485 | Apo B | 4.202   | 23.047         | 0.855   |
| rs629301_G    | cg25035485 | Apo B | 14.004  | 42.476         | 0.742   |
| rs1260326_T   | cg25035485 | Apo B | 2.269   | 2.880          | 0.431   |
| rs6756629_A   | cg25035485 | Apo B | 1.178   | 0.676          | 0.082   |
| rs144064722_G | cg25035485 | Apo B | 10.567  | 88.540         | 0.905   |
| rs182695896_C | cg25035485 | Apo B | -3.517  | 12.705         | 0.782   |
| rs10056811_A  | cg25035485 | Apo B | -0.525  | 4.150          | 0.899   |
| rs4722043_C   | cg25035485 | Apo B | 0.078   | 1.094          | 0.943   |
| rs115849089_A | cg25035485 | Apo B | -9.912  | 64.961         | 0.879   |
| rs2980875_G   | cg25035485 | Apo B | -0.420  | 0.816          | 0.607   |
| rs635634_T    | cg25035485 | Apo B | -44.950 | 890.435        | 0.960   |
| rs964184_G    | cg25035485 | Apo B | -1.430  | 0.936          | 0.127   |
| rs142130958_A | cg25035485 | Apo B | -5.004  | 19.134         | 0.794   |
| rs150617279_A | cg25035485 | Apo B | 0.962   | 1.203          | 0.424   |
| rs1081105_C   | cg25035485 | Apo B | -2.328  | 4.902          | 0.635   |
| rs1883711_C   | cg25035485 | Apo B | 0.099   | 0.674          | 0.883   |

**Table S3c: Mendelian randomization analysis using SNPs with evidence of association with apolipoprotein B from GWAS as instrumental variables to investigate reverse causation at *APOB***

| SNP           | CpG site   | Trait | Beta    | Standard Error | P-value |
|---------------|------------|-------|---------|----------------|---------|
| rs190934192_A | cg00908766 | Apo B | -0.343  | 0.515          | 0.506   |
| rs1260326_T   | cg00908766 | Apo B | 5.730   | 16.260         | 0.725   |
| rs6756629_A   | cg00908766 | Apo B | 3.700   | 4.976          | 0.457   |
| rs144064722_G | cg00908766 | Apo B | -21.624 | 355.829        | 0.952   |
| rs182695896_C | cg00908766 | Apo B | -0.658  | 0.824          | 0.425   |
| rs10056811_A  | cg00908766 | Apo B | 0.111   | 0.737          | 0.881   |
| rs4722043_C   | cg00908766 | Apo B | -0.057  | 0.802          | 0.944   |
| rs115849089_A | cg00908766 | Apo B | 1.003   | 0.835          | 0.230   |
| rs2980875_G   | cg00908766 | Apo B | 0.473   | 0.831          | 0.569   |
| rs635634_T    | cg00908766 | Apo B | 22.436  | 206.885        | 0.914   |
| rs964184_G    | cg00908766 | Apo B | -15.376 | 78.864         | 0.845   |
| rs142130958_A | cg00908766 | Apo B | 2.558   | 4.578          | 0.577   |
| rs150617279_A | cg00908766 | Apo B | 4.708   | 19.372         | 0.808   |
| rs1081105_C   | cg00908766 | Apo B | -28.185 | 594.353        | 0.962   |
| rs1883711_C   | cg00908766 | Apo B | 0.157   | 1.056          | 0.882   |

**Table S3d: Mendelian randomization analysis using SNPs with evidence of association with apolipoprotein B from GWAS as instrumental variables to investigate reverse causation at *SORT1***

| SNP         | CpG site   | Trait              | Beta    | Standard Error | P-value |
|-------------|------------|--------------------|---------|----------------|---------|
| rs7553007_A | cg04111102 | C-reactive protein | -6.406  | 7.637          | 0.402   |
| rs6734238_G | cg04111102 | C-reactive protein | -0.473  | 0.935          | 0.613   |
| rs7748513_G | cg04111102 | C-reactive protein | 2.352   | 3.575          | 0.511   |
| rs7979473_A | cg04111102 | C-reactive protein | -1.538  | 1.883          | 0.414   |
| rs1183910_A | cg04111102 | C-reactive protein | -11.801 | 70.720         | 0.868   |
| rs2259816_T | cg04111102 | C-reactive protein | -0.507  | 1.846          | 0.784   |
| rs4420638_G | cg04111102 | C-reactive protein | -14.441 | 88.345         | 0.870   |

**Table S3e: Mendelian randomization analysis using SNPs with evidence of association with C-reactive protein from GWAS as instrumental variables to investigate reverse causation at *LEPR***

| SNP          | CpG site   | Trait       | Beta   | Standard Error | P-value |
|--------------|------------|-------------|--------|----------------|---------|
| rs646776_C   | cg19610905 | Cholesterol | -8.414 | 13.767         | 0.541   |
| rs558971_A   | cg19610905 | Cholesterol | 0.260  | 0.700          | 0.710   |
| rs9306897_T  | cg19610905 | Cholesterol | 1.047  | 1.266          | 0.409   |
| rs515135_T   | cg19610905 | Cholesterol | -2.715 | 2.897          | 0.349   |
| rs780093_T   | cg19610905 | Cholesterol | 2.606  | 8.452          | 0.758   |
| rs6544713_T  | cg19610905 | Cholesterol | -1.870 | 2.846          | 0.511   |
| rs6882076_T  | cg19610905 | Cholesterol | 0.497  | 1.436          | 0.730   |
| rs9987289_A  | cg19610905 | Cholesterol | 0.294  | 5.115          | 0.954   |
| rs1883025_T  | cg19610905 | Cholesterol | 9.927  | 41.901         | 0.813   |
| rs579459_C   | cg19610905 | Cholesterol | -3.494 | 4.691          | 0.457   |
| rs1535_G     | cg19610905 | Cholesterol | 0.197  | 0.077          | 0.011   |
| rs10468017_T | cg19610905 | Cholesterol | -1.610 | 2.099          | 0.443   |
| rs2000999_A  | cg19610905 | Cholesterol | -2.258 | 2.097          | 0.282   |
| rs2156552_A  | cg19610905 | Cholesterol | 1.762  | 1.360          | 0.196   |
| rs6511720_T  | cg19610905 | Cholesterol | -1.389 | 1.847          | 0.452   |
| rs2228603_T  | cg19610905 | Cholesterol | -2.052 | 2.096          | 0.328   |

**Table S3f: Mendelian randomization analysis using SNPs with evidence of association with cholesterol from GWAS as instrumental variables to investigate reverse causation at *FADS1***

| SNP           | CpG site   | Trait  | Beta   | Standard Error | P-value |
|---------------|------------|--------|--------|----------------|---------|
| rs144064722_G | cg04087571 | Apo AI | -0.028 | 2.809          | 0.992   |
| rs1461729_A   | cg04087571 | Apo AI | 8.999  | 78.078         | 0.908   |
| rs75835816_C  | cg04087571 | Apo AI | -2.291 | 3.653          | 0.531   |
| rs1883025_T   | cg04087571 | Apo AI | 15.825 | 54.031         | 0.770   |
| rs174594_C    | cg04087571 | Apo AI | -2.513 | 2.835          | 0.376   |
| rs261291_C    | cg04087571 | Apo AI | 1.106  | 0.840          | 0.188   |
| rs73424577_G  | cg04087571 | Apo AI | 0.491  | 0.934          | 0.599   |
| rs6507939_A   | cg04087571 | Apo AI | 6.219  | 8.531          | 0.466   |

**Table S3g: Mendelian randomization analysis using SNPs with evidence of association with apolipoprotein A1 from GWAS as instrumental variables to investigate reverse causation at *APOA1***

| <b>SNP</b>  | <b>CpG site</b> | <b>Trait</b>  | <b>Beta</b> | <b>Standard Error</b> | <b>P-value</b> |
|-------------|-----------------|---------------|-------------|-----------------------|----------------|
| rs2228145_C | cg21160290      | Interleukin-6 | 0.013       | 0.183                 | 0.942          |

**Table S3h: Mendelian randomization analysis using SNPs with evidence of association with interleukin-6 from GWAS as instrumental variables to investigate reverse causation at *ABO***

| <b>SNP</b> | <b>CpG site</b> | <b>Trait</b>  | <b>Beta</b> | <b>Standard Error</b> | <b>P-value</b> |
|------------|-----------------|---------------|-------------|-----------------------|----------------|
| rs643434_A | cg02856953      | Interleukin-6 | 0.173       | 0.194                 | 0.372          |

**Table S3i: Mendelian randomization analysis using SNPs with evidence of association with interleukin-6 from GWAS as instrumental variables to investigate reverse causation at *IL6R***

| SNP        | Gene          | CpG        | Trait              | Sample Size | Beta   | SE    | P-value  |
|------------|---------------|------------|--------------------|-------------|--------|-------|----------|
| rs266772   | <i>ADIPOQ</i> | cg05578595 | Adiponectin        | 605         | -0.901 | 0.210 | 2.01E-05 |
| rs687621   | <i>ABO</i>    | cg21160290 | Interleukin-6      | 605         | -2.823 | 1.940 | 0.146    |
| rs13375019 | <i>LEPR</i>   | cg04111102 | C-reactive protein | 605         | -0.406 | 0.142 | 0.005    |
| rs7549250  | <i>IL6R</i>   | cg02856953 | Interleukin-6      | 605         | 3.123  | 3.854 | 0.418    |
| rs169109   | <i>ADIPOQ</i> | cg05578595 | Adiponectin        | 605         | -0.435 | 0.169 | 0.009    |
| rs541041   | <i>APOB</i>   | cg25035485 | Apo B              | 605         | 0.427  | 0.165 | 0.010    |
| rs7528419  | <i>SORT1</i>  | cg00908766 | Apo B              | 605         | 0.264  | 0.071 | 2.04E-04 |
| rs625145   | <i>APOA1</i>  | cg04087571 | Apo A1             | 605         | -0.316 | 0.112 | 0.005    |
| rs174544   | <i>FADS1</i>  | cg19610905 | Cholesterol        | 605         | -0.245 | 0.109 | 0.024    |
| rs6749422  | <i>ADCY3</i>  | cg01884057 | Body mass index    | 792         | 0.144  | 0.054 | 0.008    |

**Table S4: Results of Mendelian randomization analysis between DNA methylation (from cord blood) and traits**

| SNP        | Gene          | CpG        | Trait              | Sample Size | Beta   | SE    | P-value  |
|------------|---------------|------------|--------------------|-------------|--------|-------|----------|
| rs266772   | <i>ADIPOQ</i> | cg05578595 | Adiponectin        | 647         | -0.900 | 0.190 | 2.75E-06 |
| rs687621   | <i>ABO</i>    | cg21160290 | Interleukin-6      | 647         | -0.278 | 0.059 | 2.55E-06 |
| rs13375019 | <i>LEPR</i>   | cg04111102 | C-reactive protein | 647         | -0.394 | 0.108 | 2.89E-04 |
| rs7549250  | <i>IL6R</i>   | cg02856953 | Interleukin-6      | 647         | 0.708  | 0.319 | 0.027    |
| rs169109   | <i>ADIPOQ</i> | cg05578595 | Adiponectin        | 647         | -0.445 | 0.172 | 0.010    |
| rs541041   | <i>APOB</i>   | cg25035485 | Apo B              | 647         | 0.245  | 0.100 | 0.015    |
| rs7528419  | <i>SORT1</i>  | cg00908766 | Apo B              | 647         | 0.235  | 0.058 | 5.99E-05 |
| rs625145   | <i>APOA1</i>  | cg04087571 | Apo A1             | 647         | -0.255 | 0.076 | 8.95E-04 |
| rs174544   | <i>FADS1</i>  | cg19610905 | Cholesterol        | 647         | -0.248 | 0.089 | 0.005    |
| rs6749422  | <i>ADCY3</i>  | cg01884057 | Body mass index    | 846         | 0.099  | 0.05  | 0.043    |

**Table S5: Results of Mendelian randomization analysis between DNA methylation (from blood at age 15.5) and traits**



Tables S6

| CpG effect    |          |             | IL6 effect    |          |             |
|---------------|----------|-------------|---------------|----------|-------------|
| SNP           | snp_prob | snp_log10bf | SNP           | snp_prob | snp_log10bf |
| rs200533593_A | 0.994    | 3.628       | rs200533593_A | 0.232    | 0.892       |
| rs116552240_A | 0.569    | 1.533       | rs687621_G    | 0.154    | 0.670       |
| rs543040_T    | 0.312    | 1.069       | rs116552240_A | 0.123    | 0.558       |
| rs644234_G    | 0.298    | 1.039       | rs687289_A    | 0.109    | 0.499       |
| rs493246_A    | 0.199    | 0.807       | rs657152_A    | 0.106    | 0.487       |
| rs8176646_C   | 0.084    | 0.376       | rs8176646_C   | 0.058    | 0.200       |
| rs200700167_A | 0.071    | 0.293       | rs544873_A    | 0.057    | 0.191       |
| rs676457_T    | 0.067    | 0.266       | rs582094_T    | 0.055    | 0.177       |
| rs612169_G    | 0.067    | 0.266       | rs582118_G    | 0.054    | 0.167       |
| rs491626_T    | 0.062    | 0.233       | rs494242_T    | 0.053    | 0.159       |

Table S6a: Bivariate fine mapping results at the *ABO* locus

| CpG effect   |          |             | BMI effect   |          |             |
|--------------|----------|-------------|--------------|----------|-------------|
| SNP          | snp_prob | snp_log10bf | SNP          | snp_prob | snp_log10bf |
| rs6737082_C  | 0.886    | 2.595       | rs6737082_C  | 0.067    | 0.561       |
| rs59086897_A | 0.815    | 2.346       | rs6746013_G  | 0.062    | 0.526       |
| rs10865321_C | 0.521    | 1.740       | rs10182181_G | 0.062    | 0.520       |
| rs10865322_G | 0.479    | 1.667       | rs10182458_G | 0.060    | 0.512       |
| rs6746013_G  | 0.175    | 1.030       | rs6752378_A  | 0.058    | 0.493       |
| rs58048722_C | 0.099    | 0.742       | rs6749422_G  | 0.053    | 0.452       |
| rs2118826_A  | 0.092    | 0.709       | rs59086897_A | 0.050    | 0.422       |
| rs1470039_G  | 0.090    | 0.701       | rs10203482_C | 0.035    | 0.268       |
| rs4665736_C  | 0.088    | 0.690       | rs10185143_C | 0.033    | 0.239       |
| rs1172294_G  | 0.081    | 0.650       | rs58048722_C | 0.031    | 0.213       |

Table S6b: Bivariate fine mapping results at the *ADCY3* locus

| CpG effect    |          |             | Adiponectin effect |          |             |
|---------------|----------|-------------|--------------------|----------|-------------|
| SNP           | snp_prob | snp_log10bf | SNP                | snp_prob | snp_log10bf |
| rs266772_T    | 0.367    | 0.732       | rs115527175_T      | 0.821    | 1.631       |
| rs150411458_C | 0.192    | 0.346       | rs74577862_A       | 0.126    | 0.129       |
| rs78800820_C  | 0.156    | 0.234       | rs266772_T         | 0.124    | 0.12        |
| rs146920076_A | 0.156    | 0.234       | rs201071850_G      | 0.081    | -0.088      |
| rs201071850_G | 0.140    | 0.182       | rs150411458_C      | 0.072    | -0.142      |
| rs74577862_A  | 0.126    | 0.128       | rs78800820_C       | 0.054    | -0.275      |
| rs76786086_T  | 0.123    | 0.115       | rs146920076_A      | 0.054    | -0.275      |
| rs141134215_A | 0.120    | 0.106       | rs76786086_T       | 0.029    | -0.559      |
| rs189214085_G | 0.120    | 0.106       | rs202214354_G      | 0.027    | -0.580      |
| rs143257534_T | 0.120    | 0.106       | rs1011551_T        | 0.026    | -0.608      |

**Table S6c: Bivariate fine mapping results at the *ADIPOQ* (low freq) locus**

| CpG effect   |          |             | Adiponectin effect |          |             |
|--------------|----------|-------------|--------------------|----------|-------------|
| SNP          | snp_prob | snp_log10bf | SNP                | snp_prob | snp_log10bf |
| rs169109_G   | 0.472    | 1.001       | rs169109_G         | 0.421    | 0.911       |
| rs67654560_A | 0.374    | 0.826       | rs34587333_A       | 0.306    | 0.695       |
| rs34587333_A | 0.294    | 0.669       | rs266728_G         | 0.282    | 0.645       |
| rs266728_G   | 0.279    | 0.638       | rs58575091_T       | 0.161    | 0.333       |
| rs58575091_T | 0.266    | 0.609       | rs864264_C         | 0.043    | -0.297      |
| rs266720_A   | 0.183    | 0.400       | rs67654560_A       | 0.034    | -0.399      |
| rs864264_C   | 0.167    | 0.353       | rs266750_C         | 0.027    | -0.502      |
| rs843991_T   | 0.161    | 0.333       | rs266759_T         | 0.026    | -0.528      |
| rs16861153_A | 0.111    | 0.145       | rs201648331_T      | 0.026    | -0.531      |
| rs266754_T   | 0.085    | 0.018       | rs843991_T         | 0.025    | -0.541      |

**Table S6d: Bivariate fine mapping results at the *ADIPOQ* (common) locus**

| CpG effect   |          |             | APOAI effect |          |             |
|--------------|----------|-------------|--------------|----------|-------------|
| SNP          | snp_prob | snp_log10bf | SNP          | snp_prob | snp_log10bf |
| rs688456_T   | 0.957    | 2.519       | rs625145_T   | 0.225    | 0.639       |
| rs12225230_C | 0.494    | 1.166       | rs688456_T   | 0.167    | 0.478       |
| rs11216162_A | 0.335    | 0.879       | rs11216162_A | 0.059    | -0.028      |
| rs61903423_A | 0.153    | 0.435       | rs12225230_C | 0.053    | -0.078      |
| rs61905689_T | 0.105    | 0.244       | rs7932655_A  | 0.052    | -0.082      |
| rs7928320_T  | 0.077    | 0.095       | rs34999185_A | 0.051    | -0.098      |
| rs59511712_T | 0.070    | 0.054       | rs61905717_A | 0.050    | -0.103      |
| rs17120244_T | 0.069    | 0.049       | rs7928320_T  | 0.049    | -0.110      |
| rs7946729_T  | 0.063    | 0.049       | rs17120244_T | 0.047    | -0.127      |
| rs7932655_A  | 0.059    | -0.027      | rs7930783_A  | 0.044    | -0.166      |

**Table S6e: Bivariate fine mapping results at the *APOAI* locus**

| CpG effect   |          |             | APOB effect   |          |             |
|--------------|----------|-------------|---------------|----------|-------------|
| SNP          | snp_prob | snp_log10bf | SNP           | snp_prob | snp_log10bf |
| rs541041_G   | 0.148    | 1.285       | rs580889_C    | 0.108    | 1.128       |
| rs581411_G   | 0.127    | 1.211       | rs201027918_C | 0.100    | 1.091       |
| rs562338_A   | 0.122    | 1.188       | rs10692845_T  | 0.095    | 1.068       |
| rs515135_T   | 0.111    | 1.144       | rs548145_T    | 0.080    | 0.984       |
| rs563290_G   | 0.104    | 1.111       | rs541041_G    | 0.073    | 0.942       |
| rs10692845_T | 0.100    | 1.093       | rs515135_T    | 0.072    | 0.939       |
| rs668948_G   | 0.100    | 1.091       | rs562338_A    | 0.067    | 0.901       |
| rs580889_C   | 0.098    | 1.080       | rs563290_G    | 0.062    | 0.865       |
| rs548145_T   | 0.075    | 0.958       | rs668948_G    | 0.060    | 0.855       |
| rs1652416_A  | 0.016    | 0.250       | rs581411_G    | 0.060    | 0.848       |

**Table S6f: Bivariate fine mapping results at the *APOB* locus**

| CpG effect   |          |             | APOB effect  |          |             |
|--------------|----------|-------------|--------------|----------|-------------|
| SNP          | snp_prob | snp_log10bf | SNP          | snp_prob | snp_log10bf |
| rs646776_C   | 0.771    | 1.316       | rs4970836_G  | 0.164    | 0.080       |
| rs7528419_G  | 0.207    | 0.206       | rs629301_G   | 0.159    | 0.066       |
| rs629301_G   | 0.020    | -0.897      | rs599839_G   | 0.123    | -0.064      |
| rs12740374_T | 0.002    | -1.924      | rs646776_C   | 0.116    | -0.092      |
| rs4970836_G  | 0        | -6.704      | rs7528419_G  | 0.108    | -0.130      |
| rs583104_G   | 0        | -7.790      | rs583104_G   | 0.107    | -0.132      |
| rs1277930_G  | 0        | -9.292      | rs1277930_G  | 0.080    | -0.272      |
| rs599839_G   | 0        | -9.556      | rs12740374_T | 0.055    | -0.446      |
| rs660240_T   | 0        | -9.783      | rs602633_T   | 0.033    | -0.676      |
| rs57677983_C | 0        | -9.783      | rs57677983_C | 0.029    | -0.743      |

**Table S6g: Bivariate fine mapping results at the *SORT1* locus**

| CpG effect  |          |             | Cholesterol effect |          |             |
|-------------|----------|-------------|--------------------|----------|-------------|
| SNP         | snp_prob | snp_log10bf | SNP                | snp_prob | snp_log10bf |
| rs174559_A  | 0.986    | 3.274       | rs174548_G         | 0.134    | 0.612       |
| rs1535_G    | 0.527    | 1.469       | rs174560_C         | 0.116    | 0.540       |
| rs5792235_C | 0.226    | 0.887       | rs174555_C         | 0.106    | 0.494       |
| rs174561_C  | 0.221    | 0.875       | rs199977718_C      | 0.102    | 0.479       |
| rs174555_C  | 0.206    | 0.836       | rs174549_A         | 0.102    | 0.477       |
| rs174556_T  | 0.197    | 0.812       | rs174561_C         | 0.079    | 0.356       |
| rs174544_A  | 0.179    | 0.760       | rs174556_T         | 0.076    | 0.338       |
| rs174549_A  | 0.154    | 0.682       | rs28456_G          | 0.043    | 0.076       |
| rs174568_T  | 0.039    | 0.031       | rs174544_A         | 0.042    | 0.059       |
| rs174537_T  | 0.038    | 0.014       | rs174574_A         | 0.035    | -0.020      |

**Table S6h: Bivariate fine mapping results at the *FADS1* locus**

| CpG effect   |          |             | IL6 effect   |          |             |
|--------------|----------|-------------|--------------|----------|-------------|
| SNP          | snp_prob | snp_log10bf | SNP          | snp_prob | snp_log10bf |
| rs10908837_G | 0.187    | 0.607       | rs12118721_T | 0.130    | 0.420       |
| rs4845618_G  | 0.164    | 0.538       | rs10908837_G | 0.124    | 0.397       |
| rs6687726_A  | 0.163    | 0.535       | rs6687726_A  | 0.113    | 0.349       |
| rs12117832_A | 0.150    | 0.490       | rs12117832_A | 0.079    | 0.179       |
| rs7536152_A  | 0.141    | 0.459       | rs4845618_G  | 0.076    | 0.161       |
| rs12118721_T | 0.136    | 0.440       | rs10908836_C | 0.056    | 0.020       |
| rs12129500_T | 0.126    | 0.403       | rs4553185_C  | 0.047    | -0.059      |
| rs6686750_A  | 0.125    | 0.400       | rs6694817_T  | 0.043    | -0.102      |
| rs6689393_A  | 0.124    | 0.394       | rs10908838_T | 0.042    | -0.111      |
| rs7526131_G  | 0.123    | 0.393       | rs34926346_A | 0.039    | -0.143      |

**Table S6i: Bivariate fine mapping results at the *IL6R* locus**

| CpG effect   |          |             | IL6 effect     |          |             |
|--------------|----------|-------------|----------------|----------|-------------|
| SNP          | snp_prob | snp_log10bf | SNP            | snp_prob | snp_log10bf |
| rs6693842_C  | 0.754    | 2.232       | rs6700896_T    | 0.122    | 0.887       |
| rs4655764_T  | 0.583    | 1.890       | rs200641814_TA | 0.078    | 0.670       |
| rs59508186_A | 0.353    | 1.481       | rs7535218_A    | 0.067    | 0.602       |
| rs4655582_G  | 0.173    | 1.066       | rs7524581_T    | 0.051    | 0.476       |
| rs10889574_A | 0.141    | 0.959       | rs10443261_C   | 0.039    | 0.349       |
| rs11208715_T | 0.139    | 0.951       | rs7518710_G    | 0.037    | 0.328       |
| rs79653480_A | 0.139    | 0.951       | rs7541434_A    | 0.034    | 0.289       |
| rs12021623_C | 0.139    | 0.951       | rs12067936_A   | 0.032    | 0.267       |
| rs78052673_C | 0.139    | 0.951       | rs7515766_G    | 0.030    | 0.241       |
| rs6664374_T  | 0.129    | 0.916       | rs12753193_G   | 0.029    | 0.218       |

**Table S6j: Bivariate fine mapping results at the *LEPR* locus**

| SNP         | Gene          | CpG        | Pr(single var   trait) | Concordance rate | P <sub>JLIM</sub> |
|-------------|---------------|------------|------------------------|------------------|-------------------|
| rs266772    | <i>ADIPOQ</i> | cg05578595 | 0.746                  | 0.188            | <10 <sup>-6</sup> |
| rs200533593 | <i>ABO</i>    | cg21160290 | 0.699                  | 0.024            | NA                |
| rs6693842   | <i>LEPR</i>   | cg04111102 | 0.785                  | 0.213            | 0.95              |
| rs10908837  | <i>IL6R</i>   | cg02856953 | 0.929                  | 0.069            | NA                |
| rs541041    | <i>APOB</i>   | cg25035485 | 0.736                  | 0.028            | 1                 |
| rs169109    | <i>ADIPOQ</i> | cg05578595 | 0.725                  | 0.048            | <10 <sup>-6</sup> |
| rs646776    | <i>SORT1</i>  | cg00908766 | 0.984                  | 0.360            | 1                 |
| rs688456    | <i>APOA1</i>  | cg04087571 | 0.841                  | 0.077            | 1                 |
| rs174559    | <i>FADS1</i>  | cg19610905 | 0.809                  | 0.488            | 0.99              |
| rs6737082   | <i>ADCY3</i>  | cg01884057 | 0.761                  | 0.012            | <10 <sup>-6</sup> |

**Table S7: Results of bivariate fine mapping concordance and joint likelihood mapping (JLIM)** SNP – Single Nucleotide Polymorphism, Gene – likely implicated gene, CpG – 450K probe ID, Pr(single var | trait) – the posterior probability that a single causal variant is responsible for the observed effect on complex traits (based on a maximum of 5 causal variants), Concordance rate – concordance rate generated from bivariate fine mapping results, P<sub>JLIM</sub> – P value reported by the JLIM method

| <b>mQTL</b> | <b>Gene</b>  | <b>CpG</b> | <b>CpG effect</b> | <b>hQTL</b> | <b>Histone Mark</b> | <b>hQTL effect</b> | <b>hQTL P</b>           | <b>2SMR</b>    | <b>P-value</b>          |
|-------------|--------------|------------|-------------------|-------------|---------------------|--------------------|-------------------------|----------------|-------------------------|
| rs625145    | <i>APOA1</i> | cg04087571 | -0.884 (0.044)    | rs688456    | H3K4ME3             | 0.913 (0.166)      | 5.58 x 10 <sup>-7</sup> | -1.033 (0.195) | 1.13 x 10 <sup>-7</sup> |
| rs625145    | <i>APOA1</i> | cg04087571 | -0.884 (0.044)    | rs688456    | H3K27AC             | 0.758 (0.176)      | 4.95 x 10 <sup>-5</sup> | -0.857 (0.204) | 2.54 x 10 <sup>-5</sup> |
| rs625145    | <i>APOA1</i> | cg04087571 | -0.884 (0.044)    | rs688456    | H3K4ME1             | 0.930 (0.165)      | 3.04 x 10 <sup>-7</sup> | -1.052 (0.194) | 5.74 x 10 <sup>-8</sup> |
| rs10908837  | <i>IL6R</i>  | cg02856953 | -0.303 (0.039)    | rs59632925  | H3K4ME1             | 0.620 (0.138)      | 2.53 x 10 <sup>-5</sup> | -2.045 (0.526) | 1.01 x 10 <sup>-4</sup> |
| rs10908837  | <i>IL6R</i>  | cg02856953 | -0.303 (0.039)    | rs59632925  | H3K27AC             | 0.658 (0.124)      | 1.14 x 10 <sup>-6</sup> | -2.172 (0.496) | 1.18 x 10 <sup>-5</sup> |

**Table S8: Results of analysis investigating causal relationship between methylation and histone modification using Two-Sample Mendelian randomization** mQTL – methylation quantitative trait loci, Gene – likely implicated gene, CpG – 450K probe ID, CpG effect – effect estimate of SNP on methylation, hQTL – histone quantitative trait loci, hQTL effect - effect estimate of LD SNP on histone mark from Grubert et al (2015), hQTL P – P-value for hQTL effect, 2SMR effect – effect estimates from 2-Sample MR analysis, P-value – P-value for observed 2SMR effect
